# Supplementary material for: A La, Sm co-doped CeO2 support for Fe2O3 to promote chemical looping splitting of CO2 at moderate temperature
Source: Royal Society of Chemistry journal article supplement (doi:10.1039/d1se01957k), 2022-01-01
Supplement: d1se01957k1.pdf [file d1se01957k1.pdf]

# La, Sm Co-doped CeO<sub>2</sub> support for Fe<sub>2</sub>O<sub>3</sub> to promote chemical looping splitting of CO<sub>2</sub> at moderate temperature

Zhihua Gao <sup>a</sup>, Fengyan Fu <sup>a</sup>, Lili Niu <sup>a</sup>, Min Jin <sup>\*a,b</sup>

a. Hengshui University, Department of Applied Chemistry, Heping Road No. 1088, Hengshui 053000, Hebei, P.R. China;

b. Sichuan University, Huanlu Nan No.21, Chengdu 610041, Sichuan, P. R. China.

Email: [superman\\_minjin@163.com](mailto:superman_minjin@163.com)

## Supporting materials

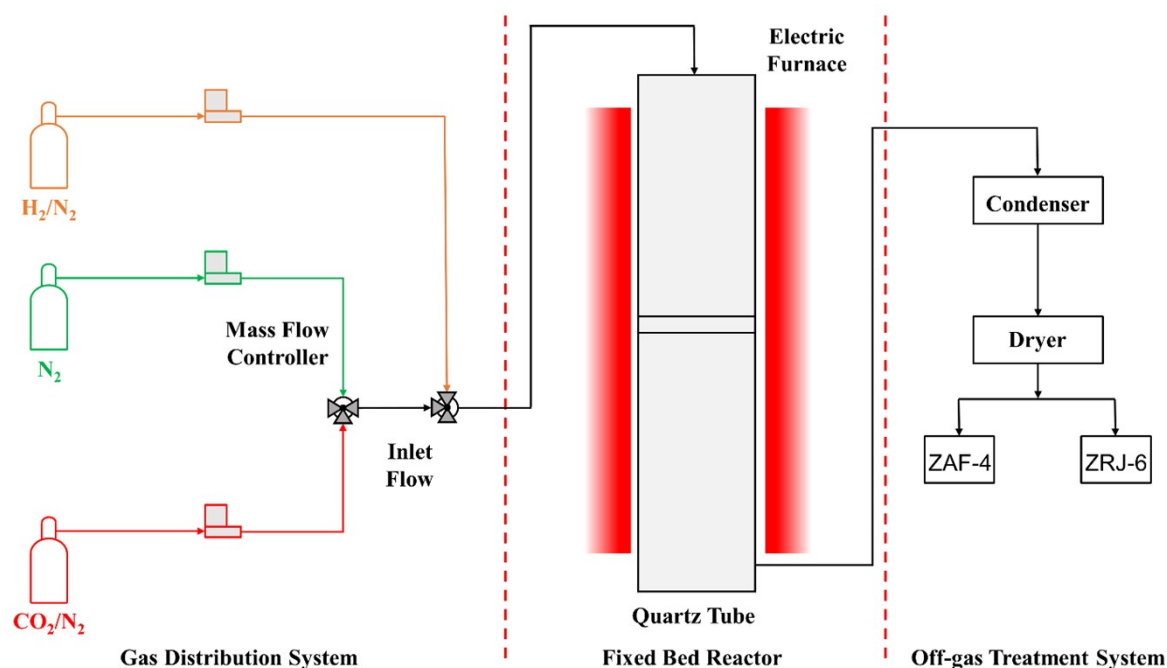

**Fig. S1.** Schematic of the fixed-bed reactor.

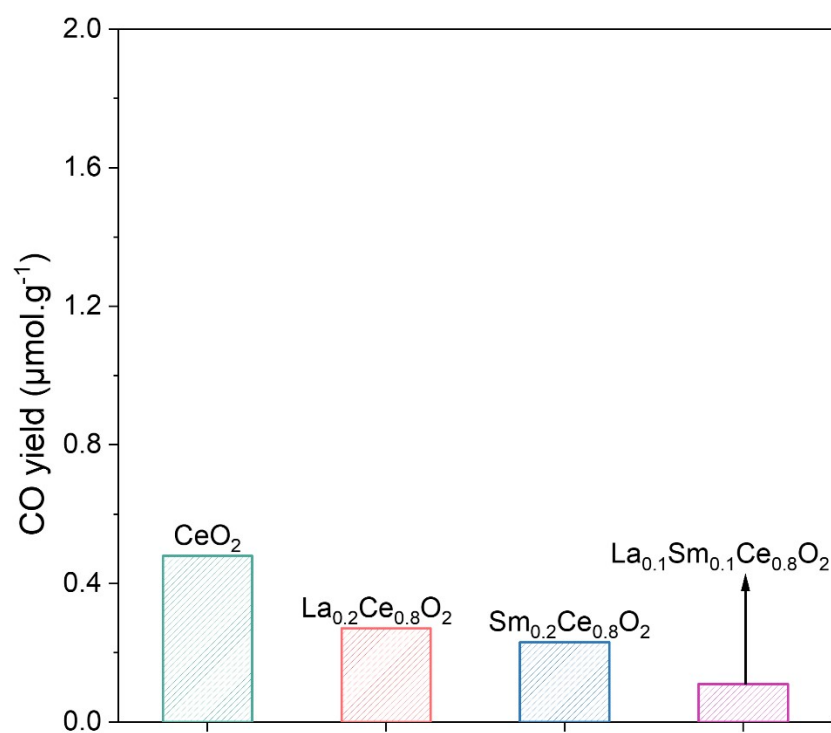

**Fig. S2.** CO<sub>2</sub> splitting performance of the support materials.
